# Supplementary material for: Heterogeneous uptake of amines onto kaolinite in the temperature range of 232–300 K
Source: Copernicus journal article supplement (doi:10.5194/acp-2016-538), 2016-06-23
Supplement: Supplementary file [file acp-2016-538-RC2-supplement.pdf]

Using a Knudsen cell reactor and ATR-FTIR, Liu et al. investigated the heterogeneous reactions of methylamine (MA), dimethylamine (DMA), and trimethylamine (TMA) with kaolinite (as a surrogate of mineral dust) and the effect of temperature. Both amines and mineral dust are important components in the troposphere, and their reactions have not been examined yet. This manuscript fits the scope of ACP well and the results are quite new. The kinetic data present by this work would help us better understand the tropospheric sinks of amines and the aging processes of mineral dust particles. This manuscript can be published after the following comments are addressed:

**Major comments:**

Line 133-136: Prior to the uptake measurement, the reaction chamber was passivated with amines to reduce/minimize the wall effect. The sample chamber also has some (though smaller compared to the reaction chamber) wall effect. Is this significant compared to the uptake by kaolinite? I believe this can be determined by background experiments in which no dust is deposited onto the sample holder.

Line 429-438: While I agree with the authors that heterogeneous reactions with mineral dust can be an important sink for these amines in the troposphere, I also have two comments: 1) the effect of gas phase diffusion needs to be discussed (Tang et al., 2015), especially for large particles (e.g., mineral dust) and fast uptake (which is also the case in this study); 2) only extreme conditions with very high dust loadings are discussed; to understand the general role of these reactions, the authors should also discuss the lifetimes under typical atmospheric conditions. By the way, the dust loading unit used in this manuscript is  $\mu\text{m}^2 \text{ cm}^{-3}$ ; while this is convenient to calculate the lifetime using Eq. (16), the corresponding mass concentration (which is more widely used) should also be provided.

Line 467-468: It is stated that physical adsorption takes place between amines and kaolinites, but no direct experimental evidence is provided. As I understand, both Knudsen cell reactor and ATR-FTIR can be used to examine whether a gas-surface reaction is reversible. I would suggest that another 1-2 figures with experimental data should be included to clarify this issue.

**Minor comments:**

Line 4: I should suggest that “amines” should be changed to “methylamine, dimethylamine, and trimethylamine (TMA)” to be specific.

Line 24-25: This statement is incorrect. The uptake coefficients were directly derived from the experimental data as discussed in Sections 3.1 and 3.2, and mass accommodation coefficients are used to derive enthalpies and entropies (Section 3.3).

Line 49: please also provide the concentrations in pptv.

Line 81: The review paper by Crowley et al. (2010) should also be cited here together with Usher et al. (2003).

Line 312: I believe “ $\gamma_{\text{eff}}$ ” should be “ $\gamma_{\text{eff}}/\gamma_{\text{obs}}$ ”.

Line 339-343: It should be further explained why the study by Wang et al. (2010a) explained the difference between Liu et al. (2012a) and Qiu et al. (2011). For the current manuscript, it is not clear to me.

Line 457-463: the effects of heterogeneous reactions on the chemical composition and IN activity of mineral dust particles is mentioned here. I do believe that it should also be mentioned in the introduction. Besides, many papers have discussed the effects of heterogeneous reaction on the hygroscopicity and CCN and IN activities of mineral dust, including those by Cziczo et al. (2009), Sullivan et al. (2009), Ma et al. (2012), Tobo et al. (2012) and Tang et al. (2016), just to name a few.

Figure 5: It will improve the readability of this figure to move  $\Delta H$  and  $\Delta S$  values to the figure caption instead.

## Reference

- Crowley, J. N., Ammann, M., Cox, R. A., Hynes, R. G., Jenkin, M. E., Mellouki, A., Rossi, M. J., Troe, J., and Wallington, T. J.: Evaluated Kinetic and Photochemical Data for Atmospheric Chemistry: Volume V - Heterogeneous Reactions on Solid Substrates, *Atmos. Chem. Phys.*, 10, 9059-9223, 2010.
- Cziczo, D. J., Froyd, K. D., Gallavardin, S. J., Moehler, O., Benz, S., Saathoff, H., and Murphy, D. M.: Deactivation of ice nuclei due to atmospherically relevant surface coatings, *Environ. Res. Lett.*, 4, 044013, 2009.
- Ma, Q. X., Liu, Y. C., Liu, C., and He, H.: Heterogeneous Reaction of Acetic Acid on MgO,  $\alpha$ -Al<sub>2</sub>O<sub>3</sub>, and CaCO<sub>3</sub> and the Effect on the Hygroscopic Behavior of These Particles, *Phys. Chem. Chem. Phys.*, 14, 8403-8409, 2012.
- Sullivan, R. C., Moore, M. J. K., Petters, M. D., Kreidenweis, S. M., Roberts, G. C., and Prather, K. A.: Timescale for Hygroscopic Conversion of Calcite Mineral Particles through Heterogeneous Reaction with Nitric Acid, *Phys. Chem. Chem. Phys.*, 11, 7826-7837, 2009.
- Tang, M. J., Shiraiwa, M., Pöschl, U., Cox, R. A., and Kalberer, M.: Compilation and evaluation of gas phase diffusion coefficients of reactive trace gases in the atmosphere: Volume 2. Diffusivities of organic compounds, pressure-normalised mean free paths,

and average Knudsen numbers for gas uptake calculations, *Atmos. Chem. Phys.*, 15, 5585-5598, 2015.

Tang, M. J., Cziczo, D. J., and Grassian, V. H.: Interactions of Water with Mineral Dust Aerosol: Water Adsorption, Hygroscopicity, Cloud Condensation and Ice Nucleation, *Chem. Rev.*, 116, 4205–4259, 2016.

Tobo, Y., DeMott, P. J., Raddatz, M., Niedermeier, D., Hartmann, S., Kreidenweis, S. M., Stratmann, F., and Wex, H.: Impacts of chemical reactivity on ice nucleation of kaolinite particles: A case study of levoglucosan and sulfuric acid, *Geophys. Res. Lett.*, 39, L19803, doi: 19810.11029/12012gl053007, 2012.

Wagner, C., Hanisch, F., Holmes, N., de Coninck, H., Schuster, G., and Crowley, J. N.: The interaction of N<sub>2</sub>O<sub>5</sub> with mineral dust: aerosol flow tube and Knudsen reactor studies, *Atmos. Chem. Phys.*, 8, 91-109, 2008.
